# Supplementary material for: Vasculogenic mimicry in small cell lung cancer
Source: PubMed Central journal article supplement (PMC5105195; doi:10.1038/ncomms13322), 2016-11-09
Supplement: ncomms13322-s1.pdf [file ncomms13322-s1.pdf]

A

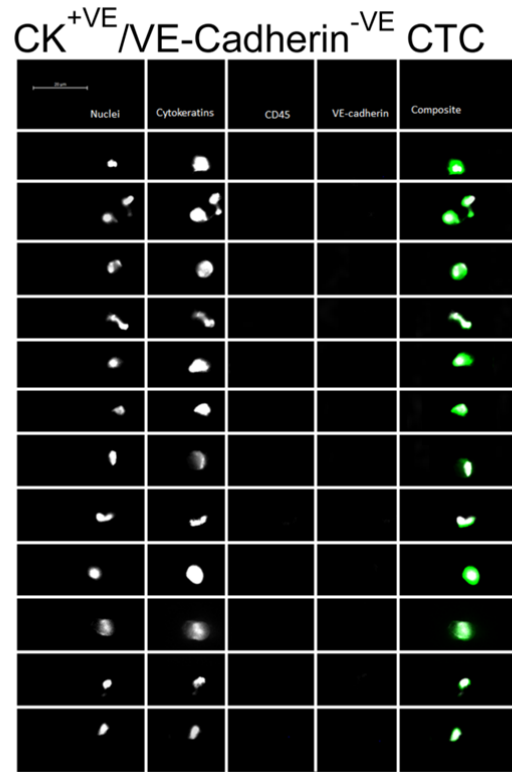

B

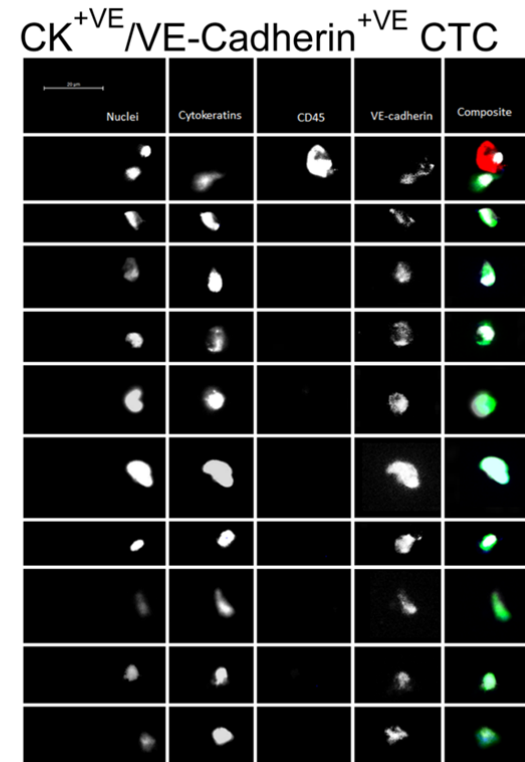

1

2 **Supplementary Figure 1. CTC Gallery of representative images from ISET filters. A** Representative images of DAPI<sup>+VE</sup>/CK<sup>+VE</sup>/VE-  
 3 Cadherin<sup>-VE</sup> CTC, **B** Representative images of DAPI<sup>+VE</sup>/CK<sup>+VE</sup>/VE-Cadherin<sup>+VE</sup> CTC. Scale bar 20µm. Individual colour channels in greyscale,  
 4 DAPI/Nuclei (first column), CK (second column) CD45 (third column) and VE-Cadherin (fourth column), pseudo coloured merged images (fifth  
 5 column).

**A**

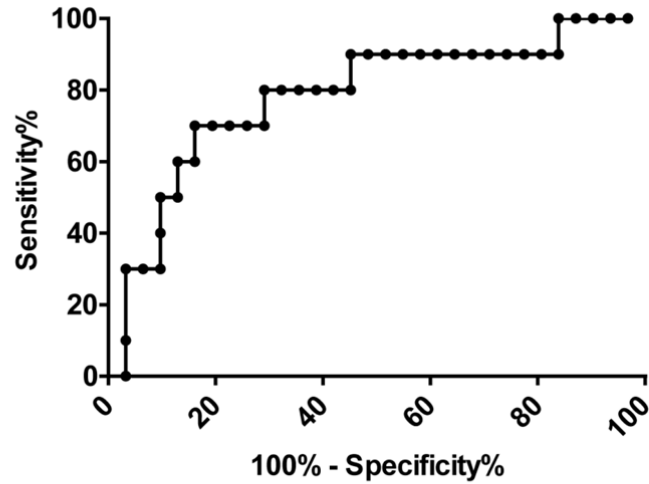

**B**

|                             |              |
|-----------------------------|--------------|
| Area under the ROC curve    |              |
| Area                        | 0.78         |
| Standard Error              | 0.088        |
| 95% confidence interval     | 0.61 to 0.96 |
| P value                     | 0.0076       |
| Data                        |              |
| Controls (Dead at 3years)   | 31           |
| Patients (Alive at 3 years) | 10           |

**C**

| Cutoff             | Sensitivity% | 95% CI                  | Specificity% | 95% CI                  |
|--------------------|--------------|-------------------------|--------------|-------------------------|
| < 0.02584          | 0.0          | 0.0% to 30.85%          | 96.77        | 83.30% to 99.92%        |
| < 0.03019          | 10.00        | 0.25% to 44.50%         | 96.77        | 83.30% to 99.92%        |
| < 0.03414          | 30.00        | 6.67% to 65.25%         | 96.77        | 83.30% to 99.92%        |
| < 0.03712          | 30.00        | 6.67% to 65.25%         | 93.55        | 78.58% to 99.21%        |
| < 0.04035          | 30.00        | 6.67% to 65.25%         | 90.32        | 74.25% to 97.96%        |
| < 0.05031          | 40.00        | 12.16% to 73.76%        | 90.32        | 74.25% to 97.96%        |
| < 0.05740          | 50.00        | 18.71% to 81.29%        | 90.32        | 74.25% to 97.96%        |
| < 0.05877          | 50.00        | 18.71% to 81.29%        | 87.10        | 70.17% to 96.37%        |
| < 0.06019          | 60.00        | 26.24% to 87.84%        | 87.10        | 70.17% to 96.37%        |
| < 0.06514          | 60.00        | 26.24% to 87.84%        | 83.87        | 66.27% to 94.55%        |
| < 0.07542          | 70.00        | 34.75% to 93.33%        | 83.87        | 66.27% to 94.55%        |
| < 0.08414          | 70.00        | 34.75% to 93.33%        | 80.65        | 62.53% to 92.55%        |
| < 0.08822          | 70.00        | 34.75% to 93.33%        | 77.42        | 58.90% to 90.41%        |
| < 0.09192          | 70.00        | 34.75% to 93.33%        | 74.19        | 55.39% to 88.14%        |
| < 0.09734          | 70.00        | 34.75% to 93.33%        | 70.97        | 51.96% to 85.78%        |
| <b>&lt; 0.1056</b> | <b>80.00</b> | <b>44.39% to 97.48%</b> | <b>70.97</b> | <b>51.96% to 85.78%</b> |
| < 0.1144           | 80.00        | 44.39% to 97.48%        | 67.74        | 48.63% to 83.32%        |
| < 0.1188           | 80.00        | 44.39% to 97.48%        | 64.52        | 45.37% to 80.77%        |
| < 0.1207           | 80.00        | 44.39% to 97.48%        | 61.29        | 42.19% to 78.15%        |
| < 0.1216           | 80.00        | 44.39% to 97.48%        | 58.06        | 39.08% to 75.45%        |
| < 0.1384           | 80.00        | 44.39% to 97.48%        | 54.84        | 36.03% to 72.68%        |
| < 0.1576           | 90.00        | 55.50% to 99.75%        | 54.84        | 36.03% to 72.68%        |
| < 0.1635           | 90.00        | 55.50% to 99.75%        | 51.61        | 33.06% to 69.85%        |
| < 0.1683           | 90.00        | 55.50% to 99.75%        | 48.39        | 30.15% to 66.94%        |
| < 0.1718           | 90.00        | 55.50% to 99.75%        | 45.16        | 27.32% to 63.97%        |
| < 0.1839           | 90.00        | 55.50% to 99.75%        | 41.94        | 24.55% to 60.92%        |
| < 0.2038           | 90.00        | 55.50% to 99.75%        | 38.71        | 21.85% to 57.81%        |
| < 0.2140           | 90.00        | 55.50% to 99.75%        | 35.48        | 19.23% to 54.63%        |
| < 0.2161           | 90.00        | 55.50% to 99.75%        | 32.26        | 16.68% to 51.37%        |
| < 0.2196           | 90.00        | 55.50% to 99.75%        | 29.03        | 14.22% to 48.04%        |
| < 0.2253           | 90.00        | 55.50% to 99.75%        | 25.81        | 11.86% to 44.61%        |
| < 0.2462           | 90.00        | 55.50% to 99.75%        | 22.58        | 9.54% to 41.10%         |
| < 0.2757           | 90.00        | 55.50% to 99.75%        | 19.35        | 7.45% to 37.47%         |
| < 0.2891           | 90.00        | 55.50% to 99.75%        | 16.13        | 5.45% to 33.73%         |
| < 0.2901           | 100.0        | 69.15% to 100.0%        | 16.13        | 5.45% to 33.73%         |
| < 0.3051           | 100.0        | 69.15% to 100.0%        | 12.90        | 3.63% to 29.83%         |
| < 0.3238           | 100.0        | 69.15% to 100.0%        | 9.677        | 2.04% to 25.75%         |
| < 0.3444           | 100.0        | 69.15% to 100.0%        | 6.452        | 0.79% to 2.42%          |
| < 0.4306           | 100.0        | 69.15% to 100.0%        | 3.226        | 0.08% to 16.70%         |

7 **Supplementary Figure 2. Receiver operating characteristic (ROC) curve analysis of SCLC tissue microarray VM scores** **A.** ROC curve  
8 with sensitivity (%) against 100-specificity (%) for VM scores from 41 SCLC TMA patients and **B.** corresponding area under the ROC curve  
9 report **C.** Table of the sensitivity and specificity for a range of VM scores identifying a threshold with the greatest sensitivity and specificity of  
10 11% (highlighted in bold font).

11

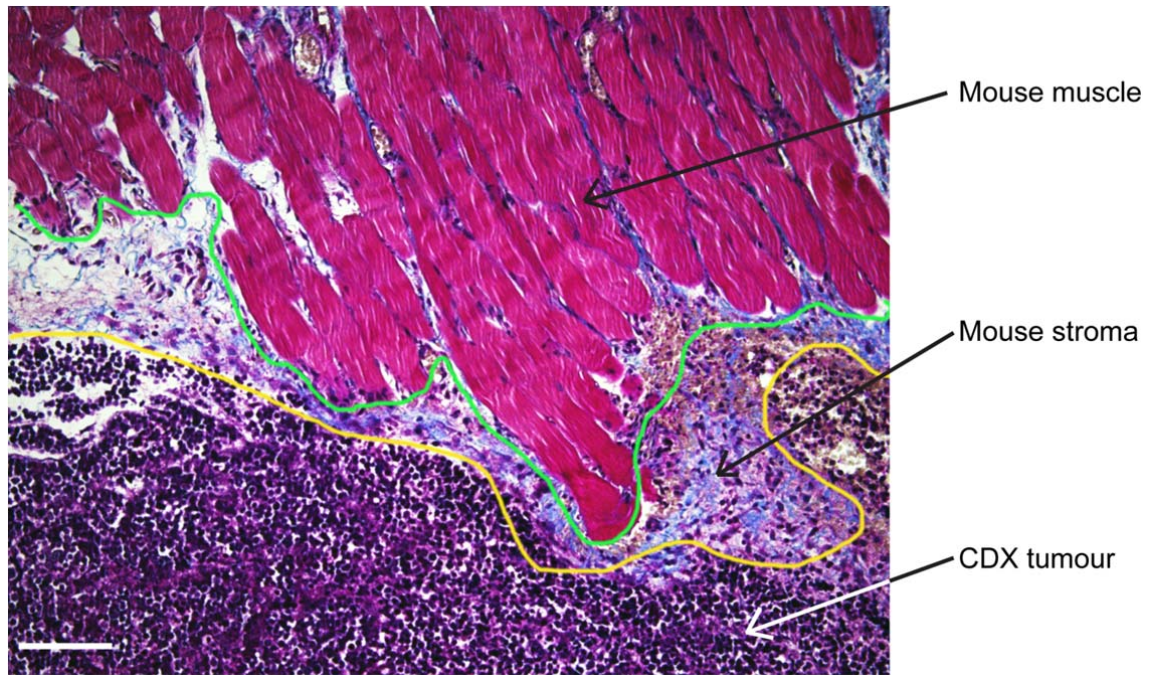

12

13 **Supplementary Figure 3. Representative image of Masson trichrome (MT) staining of**

14 **CDX tumour.** MT was used to identify muscle (Pink) and stroma (Blue) and tumour (Dark

15 Purple) regions used for controls in LCM analysis. Scale bar 100µm

16

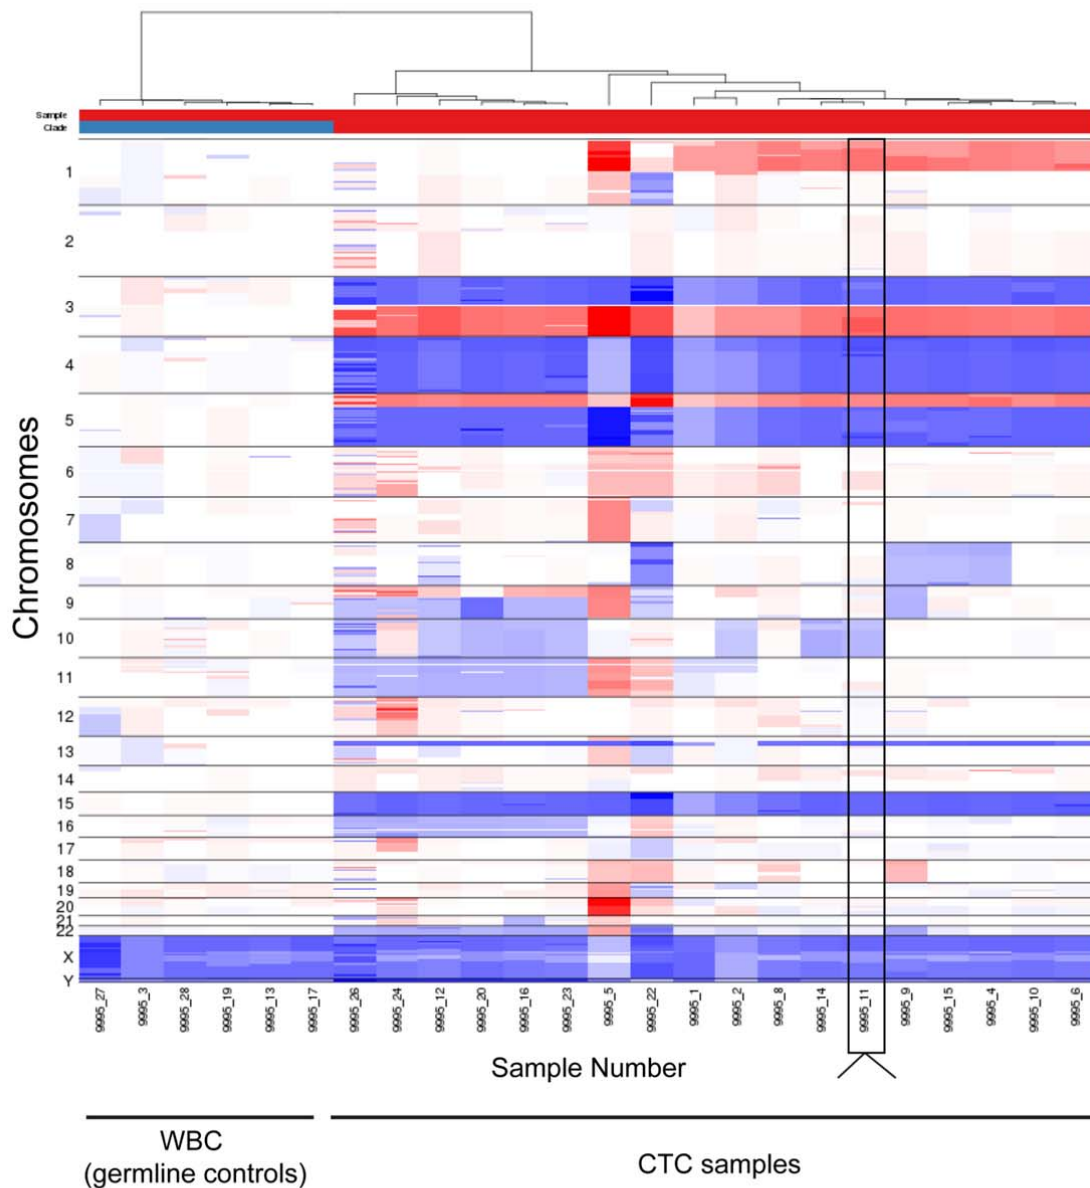

17

18 **Supplementary Figure 4. Hierarchical clustering of HD-SCA isolated CTCs.** CNA profiles  
 19 demonstrate all CTCs are clonally related to one another regardless of VE-Cadherin status,  
 20 and are distinct to normal healthy germline control samples. A VE-Cadherin<sup>+VE</sup> CTC  
 21 highlighted with arrowhead.

22

Brightfield image

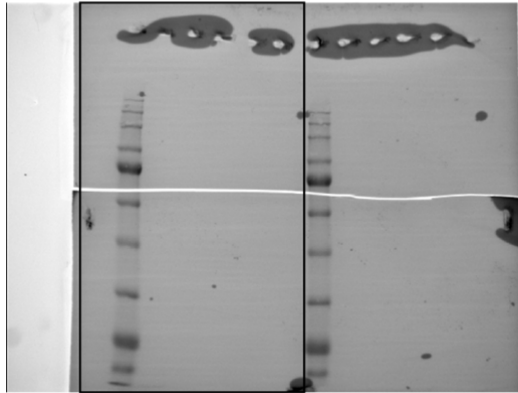

Short Exposure

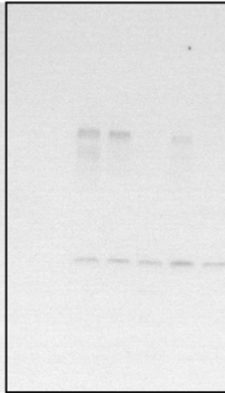

Long exposure

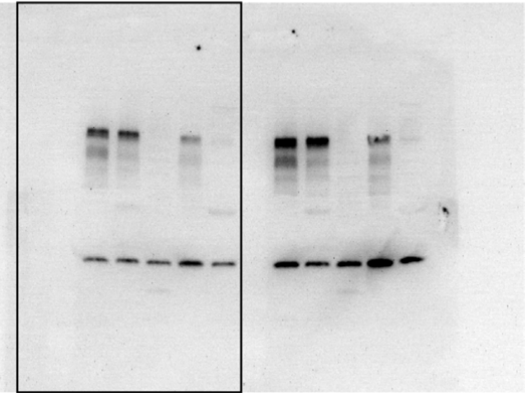

23

24 **Supplementary Figure 5. Raw western blot scans used to generate Figure 7A. Black box indicate lanes shown in main figure**

25

Brightfield image

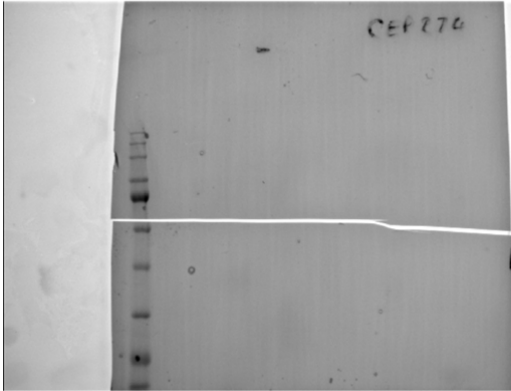

Short Exposure

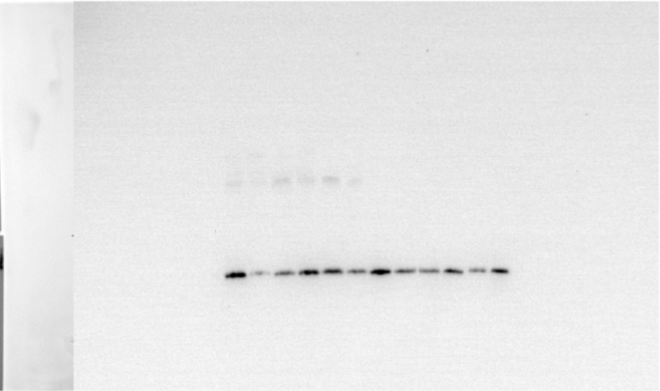

Long exposure

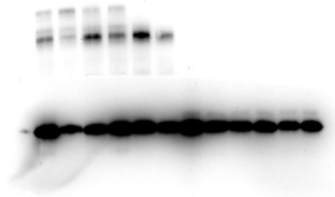

26

27 **Supplementary Figure 6. Raw western blot scans used to generate Figure 7E**

28

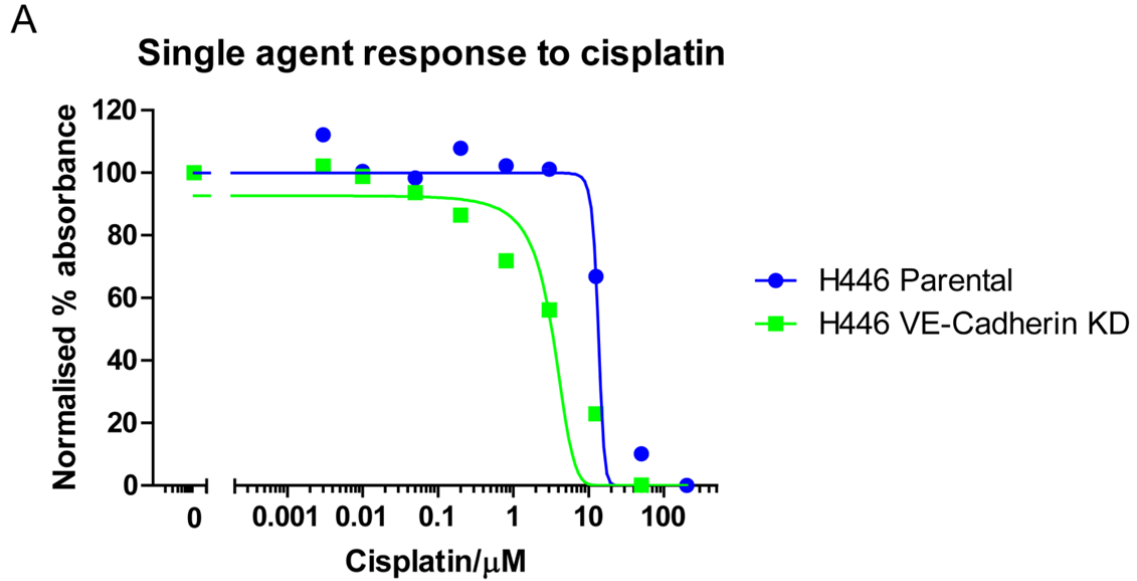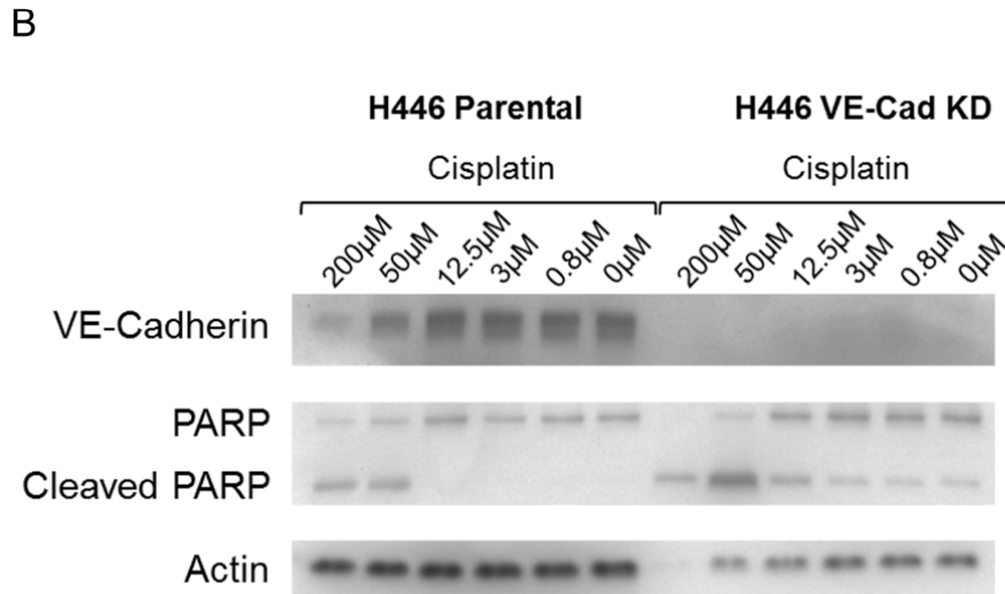

29

30 **Supplementary Figure 7. Sensitivity of H446 and H446 VE-Cadherin KD to cisplatin. A.**

31 Cisplatin concentration response curve after 72h treatment in H446 parental and H446 VE-

32 Cadherin KD cells (n=4). **B** Western blot of VE-Cadherin and cleaved PARP expression

33 following 24h cisplatin treatment in H446 parental and H446 VE-Cadherin KD cells.

34



## Single agent response to etoposide

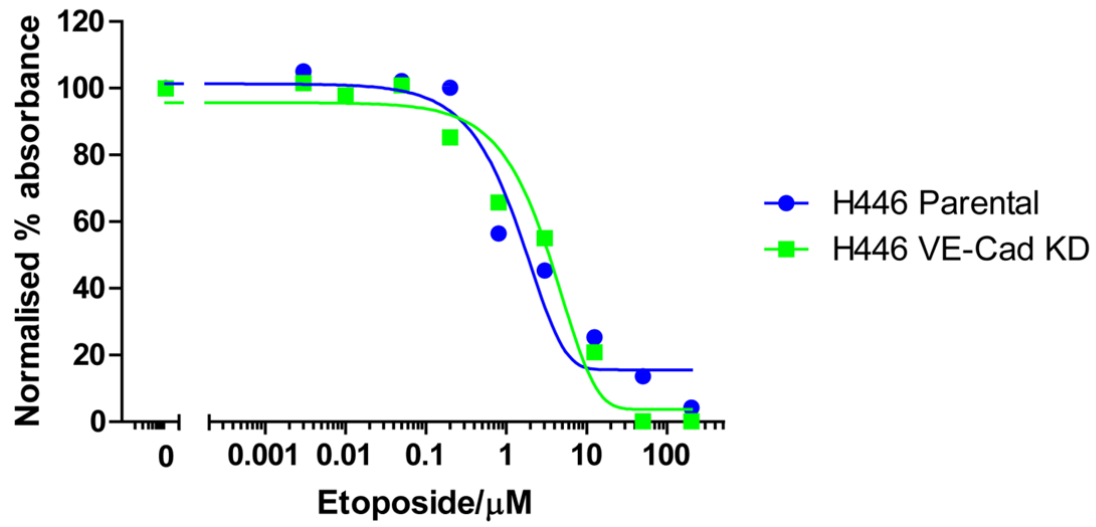

35

36 **Supplementary Figure 8. Sensitivity of H446 and H446 VE-Cadherin KD to etoposide.**

37 Etoposide concentration response curve after 72h treatment in H446 parental and H446 VE-

38 Cadherin KD (n=3).

39

|                                   | All patients (n=41) | Low TMA VM Score, ≤11% (n=17) | High TMA VM score, >11% (n=24) | p value |
|-----------------------------------|---------------------|-------------------------------|--------------------------------|---------|
|                                   | Mean (Range)        | Mean (Range)                  | Mean (Range)                   |         |
| VM score (%)                      | 15.5 (0 - 50)       | 5.8 (2.2 - 10.0)              | 22.3 (11.1 - 50)               | 0.025   |
| Overall Survival (Months)         | 13.7 (0.0-27.9)     | 23.7 (0-70.4)                 | 12.7 (6.3-19.2)                |         |
|                                   | Mean (SD)           | Mean (SD)                     | Mean (SD)                      |         |
| CD31+/PAS+ per core               | 30.0 (17.7)         | 34 (20.2)                     | 27 (15.1)                      | 0.27    |
| Age (years)                       | 62 (37 - 82)        | 58 (37 - 72)                  | 65 (51 - 82)                   | 0.01    |
|                                   | Mean Units (SD)     | Mean Units (SD)               | Mean Units (SD)                |         |
| <b>Haematology</b>                |                     |                               |                                |         |
| Haemoglobin (g/L)                 | 128 (17)            | 127 (15.8)                    | 128 (18.7)                     | 0.95    |
| Leukocytes (x10 <sup>9</sup> /L)  | 10.8 (4.3)          | 10.8 (3.6)                    | 10.8 (4.8)                     | 0.94    |
| Neutrophils (x10 <sup>9</sup> /L) | 8.2 (4.0)           | 8.3 (3.5)                     | 8.1 (4.5)                      | 0.9     |
| Platelets (x10 <sup>9</sup> /L)   | 355 (152)           | 360 (144)                     | 349 (159)                      | 0.94    |
| <b>Biochemistry</b>               |                     |                               |                                |         |
| Creatinine (umol/L)               | 82 (24)             | 78 (20)                       | 85 (27)                        | 0.5     |
| Sodium (mmol/L)                   | 134 (5.7)           | 134 (6.5)                     | 134 (5.1)                      | 0.81    |
| Lactate dehydrogenase (IU/L)      | 772 (439)           | 682 (358)                     | 833 (477)                      | 0.42    |
| Aspartate aminotrasferase (IU/L)  | 29 (11.7)           | 23 (4.1)                      | 33 (13.2)                      | 0.05    |
| Alkaline phosphatase (IU/L)       | 84 (19.8)           | 78 (18.7)                     | 88 (19.6)                      | 0.19    |
| Albumin (g/L)                     | 39 (5.7)            | 41 (4.8)                      | 37 (5.9)                       | 0.06    |

40

41 **Supplementary Table 1. Clinical Characteristics of the 41 LS SCLC patients whose lymph node biopsies comprise the tissue micro-**  
42 **array.**

|                          | Survival from diagnosis |                    |             |         |
|--------------------------|-------------------------|--------------------|-------------|---------|
|                          | All stage               |                    |             |         |
|                          | n                       | Median OS (months) | 95% CI      | p-value |
| <b>Age</b>               |                         |                    |             |         |
| <60                      | 20                      | 14.2               | 11.7 - 16.7 | 0.379   |
| 60 and over              | 21                      | 13.2               | 0.0 - 27.9  |         |
| <b>Biochemistry*</b>     |                         |                    |             |         |
| LDH <550                 | 10                      | 15.4               | 12.8 - 17.9 | 0.399   |
| LDH ≥550                 | 15                      | 11.7               | 0.0 - 26.1  |         |
| Na <132                  | 12                      | 7.8                | 0.0 - 19.1  | 0.034   |
| Na ≥ 132                 | 23                      | 15.4               | 4.6 - 26.1  |         |
| Albumin <35              | 8                       | 0.8                | 0.0 - 1.6   | 0.019   |
| Albumin ≥35              | 24                      | 14.8               | 12.8 - 16.8 |         |
| <b>Haematology</b>       |                         |                    |             |         |
| Hb <11                   | 7                       | 13.2               | 0.0 - 46.0  | 0.956   |
| Hb ≥11                   | 28                      | 13.7               | 11.0 - 16.4 |         |
| WCC ≤11                  | 22                      | 15.4               | 6.7 - 24.0  | 0.012   |
| WCC >11                  | 13                      | 5.4                | 0.0 - 13.4  |         |
| Plt ≤400                 | 23                      | 14.8               | 12.2 - 17.5 | 0.421   |
| Plt >350                 | 12                      | 8                  | 0.0 - 24.7  |         |
| <b>TMA</b>               |                         |                    |             |         |
| VM Low (≤11%)            | 17                      | 23.8               | 0 - 70.4    | 0.025   |
| VM high (>11%)           | 24                      | 13.0               | 6.3 - 19.2  |         |
| Vessels per core <median | 20                      | 13.3               | 9.9 - 16.8  | 0.79    |
| Vessels per core >median | 21                      | 14.2               | 7.4 - 21.0  |         |

43

44 **Supplementary Table 2. Univariate survival data for LS SCLC patients whose lymph**  
45 **node biopsies were subjected to the tissue microarray based analysis.** Patients with a  
46 VM score >11% had significantly reduced 3 year survival compared to those with a VM  
47 score <11% (p=0.025). \*Alk Phos, creatine and AST could not be assessed as too few  
48 samples were outside the range required to dichotomise.

49

| Index | Name      | Description  | Total reads | No. reads aligned to human | % reads aligned to human | No. reads aligned to mouse | % reads aligned to mouse | No. reads aligned to <u>both species</u> | % reads aligned to <u>both species</u> | No. reads aligned to <u>human only</u> | % reads aligned to <u>human only</u> | % mouse DNA contribution (using Germline control as baseline) |
|-------|-----------|--------------|-------------|----------------------------|--------------------------|----------------------------|--------------------------|------------------------------------------|----------------------------------------|----------------------------------------|--------------------------------------|---------------------------------------------------------------|
| 1     | CDX3\$    | VM Low       | 2776994     | 2440224                    | 87.87                    | 498257                     | 17.94                    | 442172                                   | 15.92                                  | 1998052                                | 71.95                                | 5.53                                                          |
| 2     | CDX3\$    | VM High      | 3349906     | 2724588                    | 81.33                    | 506853                     | 15.13                    | 437348                                   | 13.06                                  | 2287240                                | 68.28                                | 2.66                                                          |
| 3     | CDX3#     | VM Low       | 1232864     | 1036602                    | 84.08                    | 187986                     | 15.25                    | 156494                                   | 12.69                                  | 880108                                 | 71.39                                | 2.3                                                           |
| 4     | CDX3#     | VM High      | 1713944     | 1384899                    | 80.8                     | 309129                     | 18.04                    | 213176                                   | 12.44                                  | 1171723                                | 68.36                                | 2.04                                                          |
| 5     | patient 3 | germline     | 1920828     | 1535766                    | 79.95                    | 216040                     | 11.25                    | 199676                                   | 10.4                                   | 1336090                                | 69.56                                | 0                                                             |
| 6     | CDX3      | CDX3 tumour  | 1928136     | 1218146                    | 63.18                    | 244344                     | 12.67                    | 191192                                   | 9.92                                   | 1026954                                | 53.26                                | -0.48                                                         |
| 7     | Mouse     | Mouse stroma | 1186028     | 173052                     | 14.59                    | 1011245                    | 85.26                    | 150652                                   | 12.7                                   | 22400                                  | 1.89                                 |                                                               |
| 8     | Mouse     | Mouse muscle | 1454088     | 196500                     | 13.51                    | 1236245                    | 85.02                    | 171160                                   | 11.77                                  | 25340                                  | 1.74                                 |                                                               |

50

51 **Supplementary Table 3. Expanded analysis of the data presented in Figure 4C.** Sequencing data from the 8 different samples used for  
52 Copy Number Analysis (CNA) shows that mouse DNA contribution ranges between 0.00 to 5.53%. All reads were aligned to both human and  
53 mouse genome separately.

54

| Index | Name      | Description                                               | Total reads | No. reads aligned to human | % reads aligned to human | No. reads aligned to mouse | % reads aligned to mouse | No. reads aligned to both species | % reads aligned to both species | No. reads aligned to human only | % reads aligned to human only | % mouse DNA contribution (using Germline control as baseline) |
|-------|-----------|-----------------------------------------------------------|-------------|----------------------------|--------------------------|----------------------------|--------------------------|-----------------------------------|---------------------------------|---------------------------------|-------------------------------|---------------------------------------------------------------|
| 1     | CDX3(a)   | Mouse MHC1 <sup>-VE</sup> /bulk tumour n=1                | 4917718     | 4644004                    | 94.43                    | 1448295                    | 29.45                    | 1355916                           | 27.57                           | 3288088                         | 66.86                         | 0.77                                                          |
| 13    | CDX3(a)   | Mouse MHC1 <sup>-VE</sup> /bulk tumour n=2                | 4189188     | 3947985                    | 94.24                    | 1253751                    | 29.93                    | 1175768                           | 28.07                           | 2772217                         | 66.18                         | 1.25                                                          |
| 2     | CDX3(a)   | Mouse MHC1 <sup>-VE</sup> /VE-Cadherin <sup>+VE</sup> n=1 | 4033830     | 3798696                    | 94.17                    | 1148769                    | 28.48                    | 1070504                           | 26.54                           | 2728192                         | 67.63                         | -0.2                                                          |
| 14    | CDX3(a)   | Mouse MHC1 <sup>-VE</sup> /VE-Cadherin <sup>+VE</sup> n=2 | 4069198     | 3787527                    | 93.08                    | 1232278                    | 30.28                    | 1136436                           | 27.93                           | 2651091                         | 65.15                         | 1.6                                                           |
| 3     | CDX3(a)   | Mouse MHC1 <sup>-VE</sup> /VE-Cadherin <sup>-VE</sup> n=1 | 544340      | 514440                     | 94.51                    | 153475                     | 28.19                    | 144248                            | 26.5                            | 370192                          | 68.01                         | -0.49                                                         |
| 15    | CDX3(a)   | Mouse MHC1 <sup>-VE</sup> /VE-Cadherin <sup>-VE</sup> n=2 | 2241080     | 2107986                    | 94.06                    | 635247                     | 28.35                    | 596320                            | 26.61                           | 1511666                         | 67.45                         | -0.33                                                         |
| 4     | CDX3(b)   | Mouse MHC1 <sup>-VE</sup> /bulk tumour n=1                | 1248180     | 1171476                    | 93.85                    | 359416                     | 28.8                     | 337816                            | 27.06                           | 833660                          | 66.79                         | 0.12                                                          |
| 16    | CDX3(b)   | Mouse MHC1 <sup>-VE</sup> /bulk tumour n=2                | 2113694     | 1947690                    | 92.15                    | 607947                     | 28.76                    | 571902                            | 27.06                           | 1375788                         | 65.09                         | 0.08                                                          |
| 5     | CDX3(b)   | Mouse MHC1 <sup>-VE</sup> /VE-Cadherin <sup>+VE</sup> n=1 | 406208      | 382329                     | 94.12                    | 115811                     | 28.51                    | 108158                            | 26.63                           | 274171                          | 67.5                          | -0.17                                                         |
| 18    | CDX3(b)   | Mouse MHC1 <sup>-VE</sup> /VE-Cadherin <sup>+VE</sup> n=2 | 5004182     | 4695126                    | 93.82                    | 1559422                    | 31.16                    | 1462072                           | 29.22                           | 3233054                         | 64.61                         | 2.48                                                          |
| 6     | CDX3(b)   | Mouse MHC1 <sup>-VE</sup> /VE-Cadherin <sup>-VE</sup> n=1 | 2001928     | 1891304                    | 94.47                    | 552783                     | 27.61                    | 520302                            | 25.99                           | 1371002                         | 68.48                         | -1.07                                                         |
| 19    | CDX3(b)   | Mouse MHC1 <sup>-VE</sup> /VE-Cadherin <sup>-VE</sup> n=2 | 2707154     | 2541460                    | 93.88                    | 811421                     | 29.97                    | 762772                            | 28.18                           | 1778688                         | 65.7                          | 1.29                                                          |
| 12    | patient 3 | germline n=1                                              | 6898926     | 6499790                    | 94.21                    | 2016078                    | 29.22                    | 1890150                           | 27.4                            | 4609640                         | 66.82                         | 0.54                                                          |
| 27    | patient 3 | germline n=2                                              | 4191444     | 3944256                    | 94.1                     | 1179335                    | 28.14                    | 1105202                           | 26.37                           | 2839054                         | 67.73                         | -0.54                                                         |

55

56 **Supplementary Table 4. Sequencing data from the 10 different samples in duplicate used for Copy Number Analysis (CNA) following**57 **FACs sorting shows that mouse DNA contribution ranges between 0.00 to 2.48%. All reads were aligned to both human and mouse**58 **genome separately.**

59

| Key                | Gene  | Cytoband | SNV type          | Annotation | Amino acid change      | chr | position | ref | alt | normal_ref_count | normal_alt_count | normal_var_freq | tumour_ref_count | tumour_alt_count | tumour_var_freq | AAChange (based on refGene)                                                                                                                                                                                                                                                                                                                                                                                                                                                                                                                                                                                     | cosmic68                                                                                                                                                                                                                                                 | SNP138   |
|--------------------|-------|----------|-------------------|------------|------------------------|-----|----------|-----|-----|------------------|------------------|-----------------|------------------|------------------|-----------------|-----------------------------------------------------------------------------------------------------------------------------------------------------------------------------------------------------------------------------------------------------------------------------------------------------------------------------------------------------------------------------------------------------------------------------------------------------------------------------------------------------------------------------------------------------------------------------------------------------------------|----------------------------------------------------------------------------------------------------------------------------------------------------------------------------------------------------------------------------------------------------------|----------|
| chr17:7577535:C>A  | TP53  | 17p13.1  | nonsynonymous SNV | exonic     | R117M,R90M,R210M,R249M | 17  | 7577535  | C   | A   | 660              | 10               | 0.014925        | 359              | 225              | 0.385274        | TP53:NM_001126115:exon3:c.G350T.p.R117M,TP53:NM_001126116:exon3:c.G350T.p.R117M,TP53:NM_001126117:exon3:c.G350T.p.R117M,TP53:NM_001276697:exon3:c.G269T.p.R90M,TP53:NM_001276698:exon3:c.G269T.p.R90M,TP53:NM_001276699:exon3:c.G269T.p.R90M,TP53:NM_00126118:exon6:c.G629T.p.R210M,TP53:NM_000546:exon7:c.G746T.p.R249M,TP53:NM_001126112:exon7:c.G746T.p.R249M,TP53:NM_001126113:exon7:c.G746T.p.R249M,TP53:NM_001126114:exon7:c.G746T.p.R249M,TP53:NM_001276695:exon7:c.G629T.p.R210M,TP53:NM_001276696:exon7:c.G629T.p.R210M,TP53:NM_01276760:exon7:c.G629T.p.R210M,TP53:NM_001276761:exon7:c.G629T.p.R210M | ID=COSM43871,COSM326724,COSM1649403,COSM326723,OCURRENCE=1(breast),1(haematopoietic_and_lymphoid_tissue),3(stomach),1(pancreas),4(liver),1(oesophagus),14(lung),3(upper_aerodigestive_tract),2(large_intestine)                                          |          |
| chr17:7577565:T>C  | TP53  | 17p13.1  | nonsynonymous SNV | exonic     | N107S,N80S,N200S,N239S | 17  | 7577565  | T   | C   | 692              | 7                | 0.010014        | 403              | 240              | 0.37325         | TP53:NM_001126115:exon3:c.A320G.p.N107S,TP53:NM_001126116:exon3:c.A320G.p.N107S,TP53:NM_001126117:exon3:c.A320G.p.N107S,TP53:NM_001276697:exon3:c.A239G.p.N80S,TP53:NM_001276698:exon3:c.A239G.p.N80S,TP53:NM_001276699:exon3:c.A239G.p.N80S,TP53:NM_00126118:exon6:c.A599G.p.N200S,TP53:NM_000546:exon7:c.A716G.p.N239S,TP53:NM_001126112:exon7:c.A716G.p.N239S,TP53:NM_001126113:exon7:c.A716G.p.N239S,TP53:NM_001126114:exon7:c.A716G.p.N239S,TP53:NM_001276695:exon7:c.A599G.p.N200S,TP53:NM_001276696:exon7:c.A599G.p.N200S,TP53:NM_01276760:exon7:c.A599G.p.N200S,TP53:NM_001276761:exon7:c.A599G.p.N200S | ID=COSM47343,COSM1649401,COSM473432,OCOSM44094,OCURRENCE=1(ovary),1(breast),1(stomach),4(haematopoietic_and_lymphoid_tissue),1(kidney),1(soft_tissue),4(urinary_tract),2(oesophagus),2(lung),2(large_intestine),1(central_nervous_system),1(endometrium) |          |
| chr13:49039374:C>T | RB1   | 13q14.2  | stopgain          | exonic     | R787X                  | 13  | 4.9E+07  | C   | T   | 749              | 6                | 0.007947        | 236              | 396              | 0.626582        | RB1:NM_000321:exon23:c.C2359T.p.R787X                                                                                                                                                                                                                                                                                                                                                                                                                                                                                                                                                                           | ID=COSM23824,COSM1367318,293,OCURRENCE=1(ovary),1(prostate),1(large_intestine),2(central_nervous_system)                                                                                                                                                 | rs137853 |
| chr6:117662763:C>A | ROS1  | 6q22.1   | nonsynonymous SNV | exonic     | V1568L                 | 6   | 1.2E+08  | C   | A   | 770              | 3                | 0.003881        | 492              | 253              | 0.339597        | ROS1:NM_002944:exon29:c.G470T.p.V1568L                                                                                                                                                                                                                                                                                                                                                                                                                                                                                                                                                                          |                                                                                                                                                                                                                                                          |          |
| chr6:117714446:C>A | ROS1  | 6q22.1   | nonsynonymous SNV | exonic     | E401D                  | 6   | 1.2E+08  | C   | A   | 744              | 11               | 0.01457         | 476              | 269              | 0.361074        | ROS1:NM_002944:exon11:c.G120T.p.E401D                                                                                                                                                                                                                                                                                                                                                                                                                                                                                                                                                                           |                                                                                                                                                                                                                                                          |          |
| chr7:55280458:G>C  | EGFR  | 7p11.2   | synonymous SNV    | splicing   |                        | 7   | 5.5E+07  | G   | C   | 755              | 15               | 0.019481        | 483              | 287              | 0.372727        |                                                                                                                                                                                                                                                                                                                                                                                                                                                                                                                                                                                                                 |                                                                                                                                                                                                                                                          |          |
| chr17:59760687:T>C | BRIP1 | 17q23.2  | synonymous SNV    | exonic     | K1240K                 | 17  | 6E+07    | T   | C   | 754              | 7                | 0.009198        | 470              | 296              | 0.386423        | BRIP1:NM_032043:exon20:c.A372G.p.K1240K                                                                                                                                                                                                                                                                                                                                                                                                                                                                                                                                                                         |                                                                                                                                                                                                                                                          |          |
| chr19:9065608:T>G  | MUC16 | 19p13.2  | synonymous SNV    | exonic     | R7280R                 | 19  | 9065608  | T   | G   | 771              | 6                | 0.007722        | 592              | 151              | 0.20323         | MUC16:NM_024690:exon3:c.A21838C.p.R7280R                                                                                                                                                                                                                                                                                                                                                                                                                                                                                                                                                                        |                                                                                                                                                                                                                                                          |          |

60

61 **Supplementary Table 5 List of SNVs detected in the ctDNA of the patient's blood sample matched to that for HD-SCA analysis in**  
62 **Figure 7. Inclusion criteria required tumour variant allele frequency (VAF) to be greater than 0.025, for the fold difference between tumour VAF**  
63 **and normal VAF to be greater than 5 and for total read depth in tumour and normal samples to be greater than 200.**
